# Supplementary material for: Analysis of Air Pollutants and Their Potential Sources in Eastern Xinjiang, Northwestern Inland China, from 2018 to 2022
Source: MDPI journal article supplement (doi:10.3390/atmos14111670), 2023-11-10
Supplement: s1 [file s1]

# Supplementary information for “Analysis of Air Pollutants and Their Potential Sources in Eastern Xinjiang, Northwestern Inland China, from 2018 to 2022”

Yuanyuan Zhang <sup>1</sup>, Hui Xu<sup>1,\*</sup>, Yunhui Zhang<sup>2</sup>, Jie Luo<sup>3</sup>, Fuyao Chen<sup>1</sup>, Bo Cao<sup>1</sup> and Mingjie Xie<sup>4,\*</sup>

Text S1. Air quality index (AQI) calculation

First, according to the instructions in technical regulation on ambient air quality index (on trial) (HJ-633-2012), the individual air quality index (*iAQI*) for the six criteria pollutants was calculated as:

$$iAQI_P = \frac{I_{high} - I_{low}}{C_{high} - C_{low}} (C_P - C_{low}) + I_{low} \quad (1)$$

*iAQI<sub>P</sub>*: *iAQI* for air pollutant *P*;

*C<sub>P</sub>*: the concentration of pollutant *P*;

*C<sub>low</sub>*: the concentration breakpoint that is  $\leq C_P$ ;

*C<sub>high</sub>*: the concentration breakpoint that is  $\geq C_P$ ;

*I<sub>low</sub>*: the index breakpoint corresponding to *C<sub>low</sub>*;

*I<sub>high</sub>*: the index breakpoint corresponding to *C<sub>high</sub>*.

The overall AQI is determined by the highest *iAQI* of all the six pollutants:

$$AQI = \max(I_1, I_2, \dots, I_n) \quad (2)$$

Grade I: 0–50, Good

Grade II: 51–100, Moderate

Grade III: 101–150, Unhealthy for Sensitive Groups

Grade IV: 151–200, Unhealthy

Grade V: 201–300, Very unhealthy

Grade VI: 300–500, Hazardous

when the AQI exceeds 50, the pollutant with the highest *iAQI* value is considered the main pollutant.

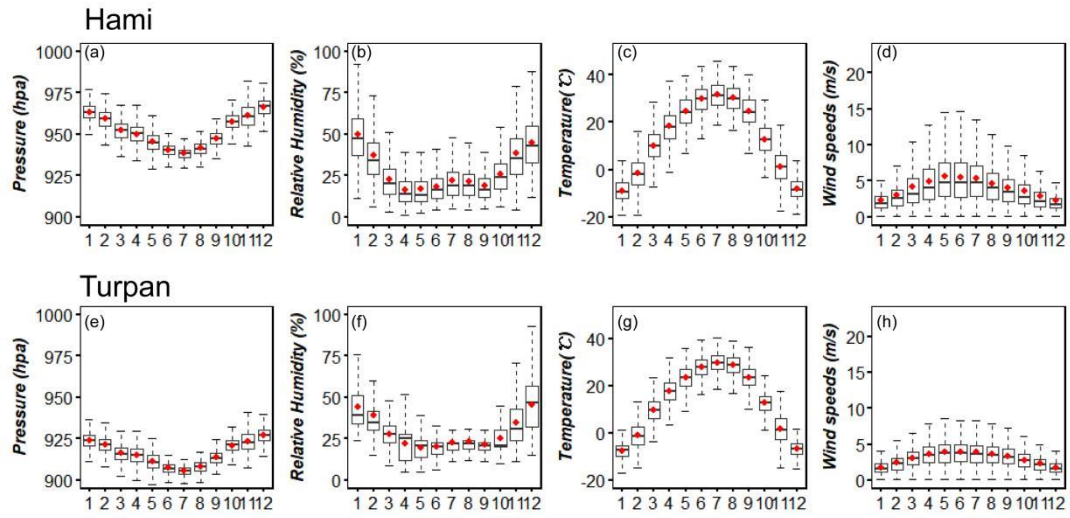

**Figure S1.** The monthly variations of meteorological factors in Hami and Turpan.

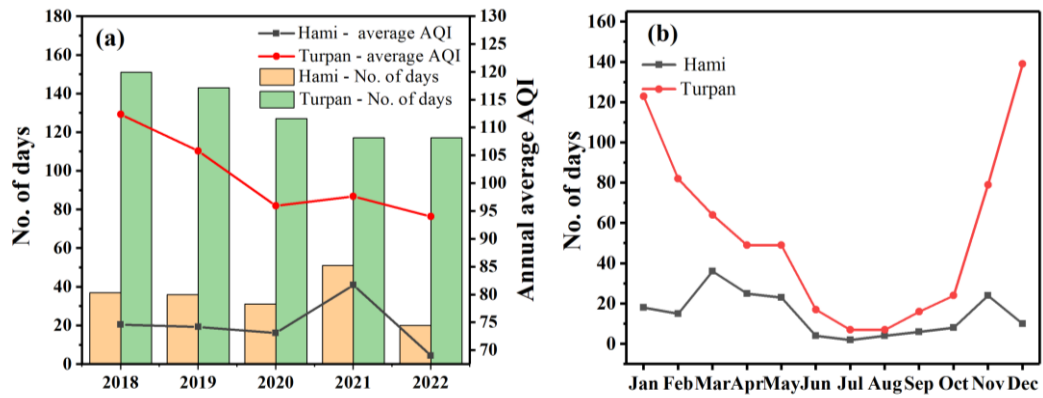

**Figure S2.** The number of days exceeding AQI standards in each year (a) and month (b) for Hami and Turpan during the whole period.

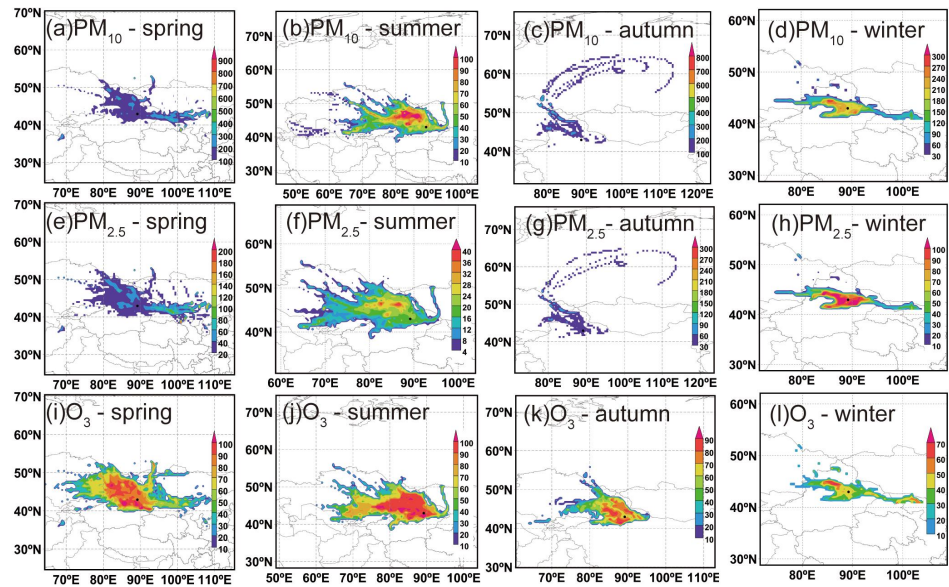

**Figure S3.** CWT analysis results for  $PM_{10}$ ,  $PM_{2.5}$ , and  $O_3$  in the eastern Xinjiang region during different seasons in 2022.

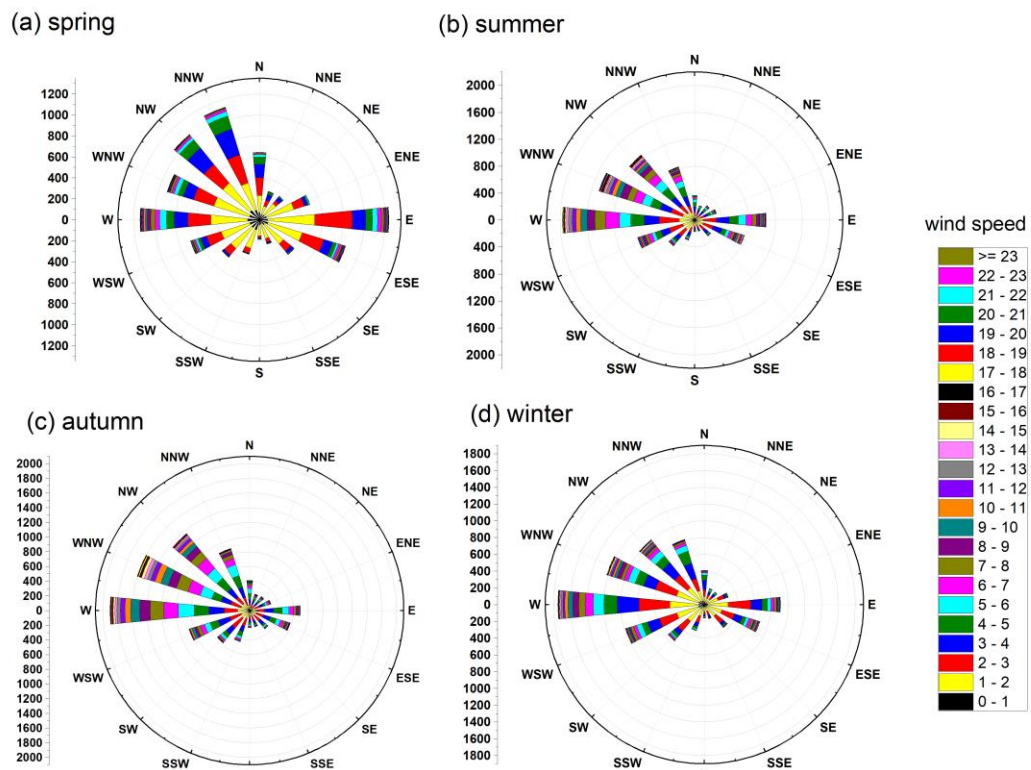

**Figure S4.** Seasonal wind rose diagram for the Turpan Region in 2022.

**Table S1.** Statistics of hourly measurements of the six criteria air pollutants for AQI calculation.

|                                                 |                              | PM <sub>2.5</sub>  | PM <sub>10</sub>   | CO                 | NO <sub>2</sub>    | O <sub>3</sub> -8h | SO <sub>2</sub>    | AQI         |
|-------------------------------------------------|------------------------------|--------------------|--------------------|--------------------|--------------------|--------------------|--------------------|-------------|
|                                                 |                              | µg·m <sup>-3</sup> | µg·m <sup>-3</sup> | mg·m <sup>-3</sup> | µg·m <sup>-3</sup> | µg·m <sup>-3</sup> | µg·m <sup>-3</sup> |             |
| Hami<br>(No. of<br>obs.:<br>43130) <sup>a</sup> | min                          | 1.00               | 2.00               | 0.10               | 1.00               | 1.00               | 1.00               | 9.00        |
|                                                 | median                       | 22.0               | 69.0               | 0.60               | 21.0               | 61.0               | 5.00               | 60.0        |
|                                                 | Mean ±<br>stdev <sup>b</sup> | 29.0 ± 26.6        | 95.5 ± 144         | 0.79 ± 0.64        | 28.0 ± 22.1        | 60.0 ± 33.3        | 8.50 ± 11.8        | 71.9 ± 56.7 |
|                                                 | max                          | 535                | 4574               | 8.70               | 145                | 230                | 353                | 500         |
|                                                 | missing% <sup>c</sup>        | 5.20%              | 8.97%              | 5.49%              | 5.22%              | 4.19%              | 4.95%              | 6.93%       |
| Turpan<br>(No. of<br>obs.: 43720)               | min                          | 1.00               | 5.00               | 0.10               | 4.00               | 3.00               | 1.00               | 16.0        |
|                                                 | median                       | 36.0               | 114                | 0.70               | 27.0               | 59.0               | 7.00               | 84.0        |
|                                                 | Mean ± stdev                 | 54.3 ± 61.8        | 160 ± 212          | 1.12 ± 0.92        | 32.6 ± 20.5        | 60.2 ± 32.1        | 9.25 ± 6.70        | 110 ± 88.8  |
|                                                 | max                          | 1801               | 3840               | 7.30               | 124                | 156                | 294                | 500         |
|                                                 | missing%                     | 6.55%              | 7.19%              | 6.69%              | 7.80%              | 5.71%              | 6.33%              | 8.25%       |

<sup>a</sup> Number of observations; <sup>b</sup> standard deviation; <sup>c</sup> missing% = number of missing values/total number of observations × 100%.

**Table S2.** Average PM<sub>2.5</sub>, PM<sub>10</sub>, and O<sub>3</sub> concentrations in different clusters of eastern Xinjiang during the four seasons of 2022.

| Season | Clusters | Probability<br>% | Average mass concentration (µg·m <sup>-3</sup> ) |                  |                |
|--------|----------|------------------|--------------------------------------------------|------------------|----------------|
|        |          |                  | PM <sub>2.5</sub>                                | PM <sub>10</sub> | O <sub>3</sub> |
| Spring | 1        | 20.5             | 31.4                                             | 114              | 88.2           |
|        | 2        | 19.4             | 42.1                                             | 166              | 93.0           |
|        | 3        | 3.63             | 41.1                                             | 214              | 94.7           |
|        | 4        | 30.8             | 29.5                                             | 112              | 87.7           |
|        | 5        | 5.00             | 40.2                                             | 208              | 88.2           |
|        | 6        | 5.09             | 120                                              | 423              | 87.1           |
|        | 7        | 15.5             | 40.1                                             | 181              | 87.3           |
|        | All      | 100              | 39.6                                             | 158              | 89.0           |
| Summer | 1        | 38.1             | 22.3                                             | 74.3             | 94.9           |
|        | 2        | 14.5             | 21.1                                             | 75.3             | 101            |
|        | 3        | 17.7             | 17.5                                             | 52.8             | 94.6           |
|        | 4        | 12.3             | 24.7                                             | 77.4             | 98.7           |
|        | 5        | 17.5             | 21.6                                             | 73.7             | 91.9           |
|        | All      | 100              | 21.5                                             | 71.1             | 95.7           |
| Autumn | 1        | 12.9             | 30.7                                             | 98.1             | 70.8           |
|        | 2        | 22.3             | 35.6                                             | 120              | 75.4           |
|        | 3        | 2.43             | 37.0                                             | 142              | 69.9           |
|        | 4        | 44.3             | 30.9                                             | 80.9             | 68.6           |
|        | 5        | 4.59             | 37.5                                             | 108              | 79.5           |
|        | 6        | 0.83             | 288                                              | 1555             | 61.2           |
|        | 7        | 3.44             | 68.6                                             | 210              | 74.0           |
|        | 8        | 9.23             | 28.7                                             | 74.3             | 64.7           |
|        | All      | 100              | 35.7                                             | 112              | 70.7           |
| Winter | 1        | 18.6             | 98.7                                             | 209              | 40.9           |
|        | 2        | 28.1             | 97.2                                             | 203              | 39.1           |
|        | 3        | 6.59             | 86.0                                             | 213              | 55.3           |
|        | 4        | 1.30             | 54.9                                             | 157              | 61.3           |
|        | 5        | 41.8             | 97.8                                             | 203              | 42.8           |
|        | 6        | 3.62             | 66.6                                             | 182              | 46.0           |
|        | All      | 100              | 95.5                                             | 203              | 42.6           |
